# Supplementary figures and images for: Effect of Proton Therapy on Tumor Cell Killing and Immune Microenvironment for Hepatocellular Carcinoma
Source: MDPI journal article supplement (doi:10.3390/cells12020332), 2023-01-15

# Supplementary Figure S1

(a)

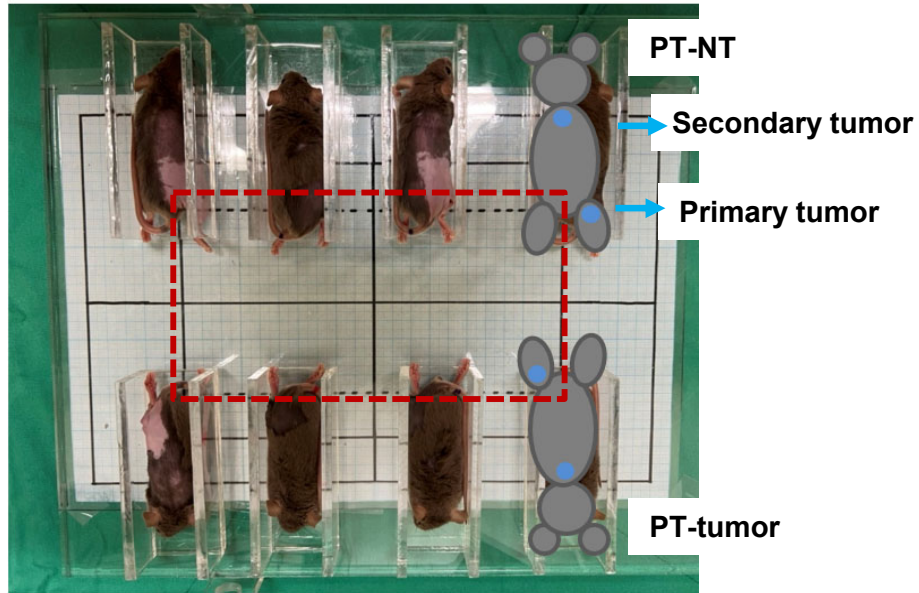

(c) Secondary tumor

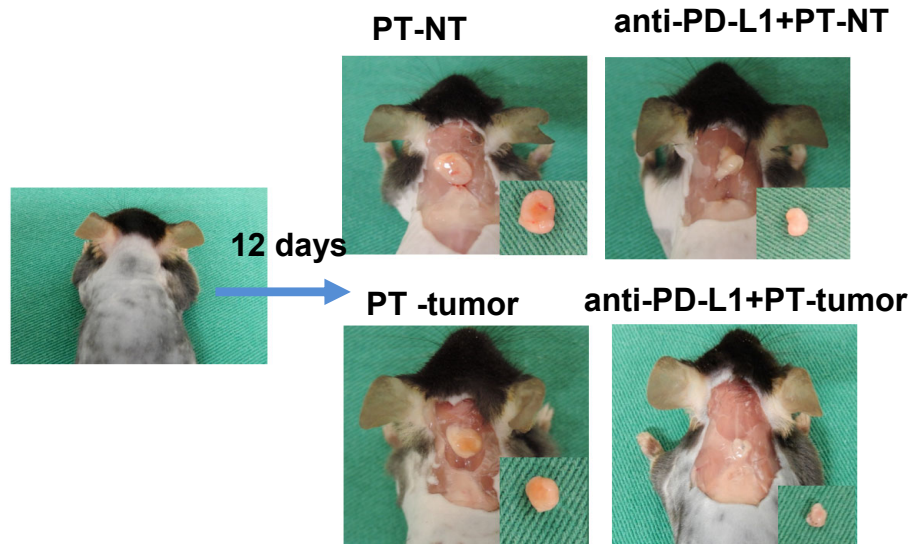

(b)

PT-NT

Anti-PD-L1  
+PT-NT

PT-tumor

Anti-PD-L1  
+PT-tumor

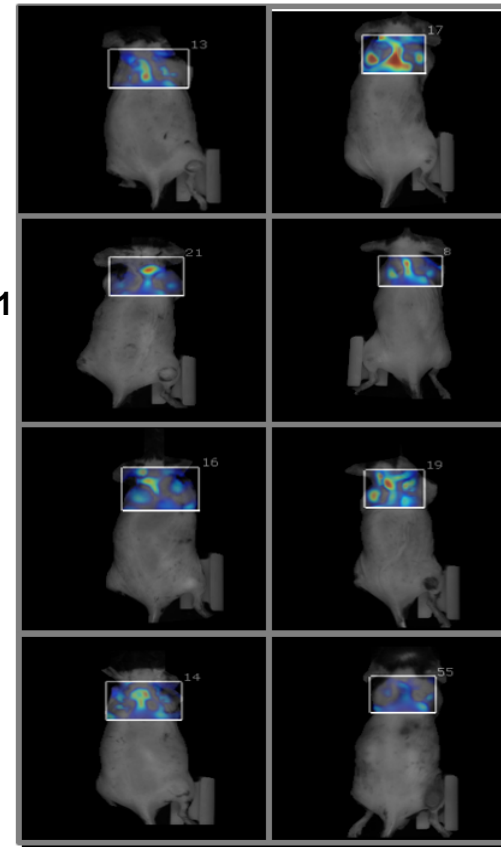

Supplement: s1 [file s1]
